# Supplementary material
Source: PubMed Central journal article supplement (PMC3786331)
Supplement: NIHMS458917-supplement-01.pdf [file NIHMS458917-supplement-01.pdf]

## SUPPLEMENTAL METHODS

### Mediational Model

The mediational model was tested using Baron and Kenny's (46) four-step method followed by a bootstrapping procedure with bias-corrected confidence intervals. According to Baron and Kenney's widely accepted method for tests of mediation, potential carrier emotions may be considered to be a mediator of the association between self-esteem and fertility distress if the following conditions are met: 1) Self-esteem is signifi-

cantly associated with fertility distress in the absence of potential carrier emotions (path c in Fig. 2 is significant); 2) self-esteem is significantly associated with potential carrier emotions (path a is significant); 3) potential carrier emotions are significantly and independently associated with fertility distress (path b is significant); and 4) the association between self-esteem and fertility distress is reduced when the potential carrier emotions variable is added to the model (the magnitude of path  $c'$  is less than that of path c).

**SUPPLEMENTAL FIGURE 1**

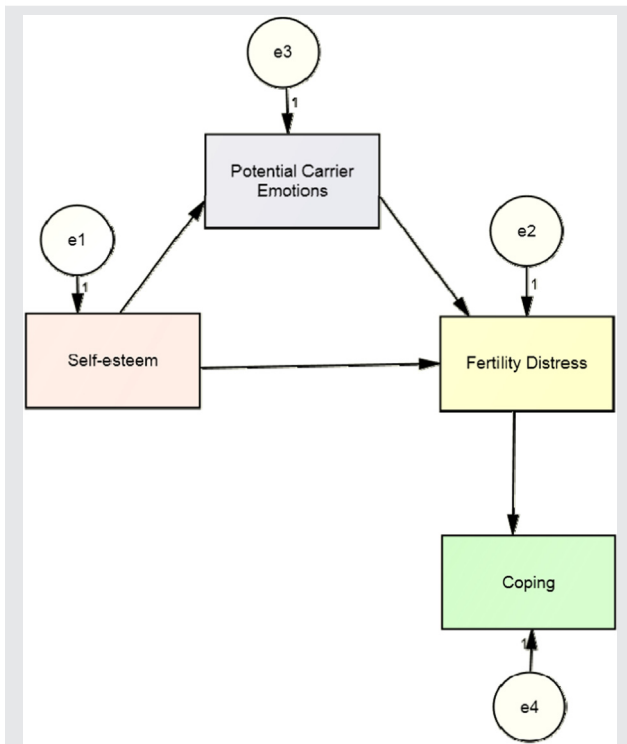

The hypothesized path model with error terms for associations among self-esteem, fertility distress, potential carrier emotions, and coping.

*Cizmeli. Fertility distress in women with DOR. Fertil Steril 2013.*

## SUPPLEMENTAL TABLE 1

Unstandardized regression coefficients with bootstrapping standard errors and bias-corrected 95% confidence intervals (CIs) for each path in the mediation model.

| Path    |                                                                                  | <i>b</i> | SE   | Bootstrap   |             |
|---------|----------------------------------------------------------------------------------|----------|------|-------------|-------------|
|         |                                                                                  |          |      | Lower bound | Upper bound |
| Path c  | Self-esteem → fertility distress                                                 | −27.62*  | 9.05 | −45.26      | −18.99      |
| Path a  | Self-esteem → potential carrier emotions                                         | 11.84*   | 3.77 | 4.30        | 18.99       |
| Path b  | Potential carrier emotions → fertility distress                                  | −0.76*   | 0.31 | −1.40       | −0.18       |
| Path c' | Self-esteem → fertility distress (in the presence of potential carrier emotions) | −18.59*  | 9.30 | −37.30      | −1.02       |

\*  $P < .05$ .

*Cizmeli. Fertility distress in women with DOR. Fertil Steril 2013.*
